# Supplementary material for: A Novel Feature Selection Strategy for Enhanced Biomedical Event Extraction Using the Turku System
Source: Hindawi journal article supplement (doi:10.1155/2014/205239), 2014-01-01
Supplement: f1 [file 205239.f1.pdf]

# Appendix A

## (Feature generation rule)

**Table A1. Trigger features**

| Feature name           | Def                                                            | Example                                                                                     |
|------------------------|----------------------------------------------------------------|---------------------------------------------------------------------------------------------|
| #Sentence feature      |                                                                |                                                                                             |
| bow                    | Token count                                                    | bow_-induced                                                                                |
| nameCount              | Count of token                                                 | nameCount_9                                                                                 |
| ne_bow                 | Count of token which satisfies isName = True                   | ne_bow_ATF-2                                                                                |
| #main features         |                                                                |                                                                                             |
| POS                    | About part of speech                                           | POS_MD                                                                                      |
| txt                    | Txt content of token                                           | txt_A-activated:                                                                            |
| nonstem                | Remaining part after Porter stemmer                            | nonstem_ation                                                                               |
| stem                   | Stem got by Porter Stemmer                                     | nonstem_ancies                                                                              |
| #linearorder feature   |                                                                |                                                                                             |
| linear                 | About linear order of the sentence which contains this token   | linear_-1_POS_CC<br>linear_-1_txt_'nuclea'<br>linear_-1_isName<br>linear_-1_annType_protein |
| #content feature       |                                                                |                                                                                             |
| upper                  | Letter case                                                    | upper_case_middle<br>upper_case_start                                                       |
| has                    | Digital info of token                                          | has_digits<br>has_fslash<br>has_hyphen<br>has_hyphenated_digit                              |
| dt                     | Double letter in token                                         | dt_s+                                                                                       |
| tt                     | Triple letter in token                                         | tt_lop                                                                                      |
| #attached edge feature |                                                                |                                                                                             |
| t1Hin                  | In edge                                                        | t1Hin_Extinction                                                                            |
| t1HOut                 | Out ege                                                        | t1HOut_Surfactant                                                                           |
| #chain feature         |                                                                |                                                                                             |
| chain                  | Dependency information along with its direction info in chains | chain_dist_dist_1-frw_advcl-frw_conj_and-rev_prep_in                                        |
| dep                    | Distance char in chain                                         | dep_dist_dist_1conj_with                                                                    |
| dist                   | Distance char in chain                                         | dist_3_txt_densitometry                                                                     |

**Table A2. Edge features**

| Feature name             | Def                 | Example              |
|--------------------------|---------------------|----------------------|
| #EntityFeatures          |                     |                      |
| e1_txt<br>e2_txt         | Txt of Nodes info   | e1_txt_transfection  |
| e1_POS<br>e2_POS         | Pos of nodes info   | e1_POS_NNS           |
| e1_annType<br>e2_annType | Class info of nodes | e1_annType_e1_Entity |

|                                                                                                   |                                                                                                                        |                                                                                                        |
|---------------------------------------------------------------------------------------------------|------------------------------------------------------------------------------------------------------------------------|--------------------------------------------------------------------------------------------------------|
| e1_strength<br>e2_strength                                                                        | Normalization value of anntype                                                                                         | e1_strength_Binding                                                                                    |
| e1_InteractionWord_e2_                                                                            | isName=true of false for nodes                                                                                         | e1_InteractionWord_e2_Entity<br>e1_InteractionWord_e2_InteractionWord                                  |
| eTypes                                                                                            | Anntype of nodes                                                                                                       | eTypes_Binding_Binding                                                                                 |
| selfLoop                                                                                          | selfLoop=1 if the two nodes is the one                                                                                 |                                                                                                        |
| #PathLengthFeatures                                                                               |                                                                                                                        |                                                                                                        |
| len                                                                                               | Length of the shortest path                                                                                            |                                                                                                        |
| len_tokens                                                                                        | Length value of the shortest path                                                                                      | len_tokens_15                                                                                          |
| #TerminusTokenFeature<br>(It could be omitted, since they are totally repeate in #EntityFeatures) |                                                                                                                        |                                                                                                        |
| #SingleElementFeature                                                                             |                                                                                                                        |                                                                                                        |
| dep_Forward<br>dep_Reverse                                                                        | Dependency between e1 and e2                                                                                           | dep_Reverse_appos                                                                                      |
| internalPOS<br>internalTxt<br>internalDep                                                         | Count thee POS, txt, dep info in the shortest path.                                                                    | internalPOS_AUX<br>internalTxt_CAMs<br>internalDep_abbrev                                              |
| #PathGram                                                                                         |                                                                                                                        |                                                                                                        |
| tokenPath                                                                                         | annotation type in the shortest path between e1 and e2.                                                                | tokenPath_Binding_e1_Binding_ _Binding_                                                                |
| tok                                                                                               | Pos, txt between e1 and e2, along with direction of dependency                                                         | tok_FFFFPOS_AUX<br>tok_FFFFtxt_Addition<br>tok_FFFFannType_Binding                                     |
| depGram                                                                                           | Dep between e1 and e2, along with direction of dependency                                                              | depGram_RFFF_nsubj_prep_for<br>_prep_of_amod                                                           |
| dep_[RF]{2,4}[0-3]                                                                                | Dep info in a sliding windows between e1 and e2, along with direction of dependency                                    | dep_RR0_prep_upon<br>dep_RR1_dep                                                                       |
| edge_directions                                                                                   | The direction of dependency in the shorted path                                                                        | edge_directions_FFFFFFFF                                                                               |
| other                                                                                             | Annotation type info in the shorted path                                                                               | e1_Binding_depGram_FFFF_abbrev_nsubjpass_amod_hyphen_Protein                                           |
| #PathEdgeFeature                                                                                  |                                                                                                                        |                                                                                                        |
| txt                                                                                               | The existence of txt                                                                                                   | txt_weak                                                                                               |
| POS                                                                                               | The existence of POS                                                                                                   | POS_VB                                                                                                 |
| annType                                                                                           | annotation type in the shortest path                                                                                   | annType_e1_Binding                                                                                     |
| gov                                                                                               | Txt, POS and anntype in the adjacent nodes in the shortest path                                                        | gov_NNPS_JJ                                                                                            |
| triple                                                                                            | triple_Binding_advcl_Binding:                                                                                          | triple_Binding_advcl_Binding:                                                                          |
| dep                                                                                               | Dep info in the adjacent nodes in the shortest path                                                                    | Dep_prep_over                                                                                          |
| #SentenceFeature                                                                                  |                                                                                                                        |                                                                                                        |
| count                                                                                             | Count the occurrence of Anntype in the sentence which contain the shortest path.                                       | count_Transcription                                                                                    |
| #GENIA                                                                                            |                                                                                                                        |                                                                                                        |
| GENIA                                                                                             | One is for entity1: isname=false<br>Second is e1 s isname=true<br>Third is e2 s isname=false<br>Forth is e2 isnae=true | GENIA_regulation_of_event<br>GENIA_regulation_of_protein<br>GENIA_nested_event<br>GENIA_target_protein |

## *Appendix B*

### *(Feature combination experiment)*

**Table B1. Trigger feature contribution with combination**

| #One feature class               |            |                  |                      |
|----------------------------------|------------|------------------|----------------------|
| Name of feature classes          | F-score(%) | Size of features | Average contribution |
| 1                                | None       | 18998            | 0                    |
| 2                                | 42.05      | 24944            | 0.001685776          |
| 3                                | 3.5        | 73744            | 4.74615E-05          |
| 4                                | 27.11      | 8573             | 0.003162254          |
| 5                                | 7.33       | 100561           | 7.28911E-05          |
| 6                                | 5.48       | 178345           | 3.0727E-05           |
|                                  |            |                  |                      |
| #Two feature class combination   |            |                  |                      |
| Name of feature classes          | F-score(%) | Size of features | Average contribution |
| 1&2                              | 0          | 43942            | 0                    |
| 1&3                              | 0          | 92742            | 0                    |
| 1&4                              | 45.39      | 27571            | 0.001646295          |
| 1&5                              | 0.91       | 119559           | 7.6113E-06           |
| 1&6                              | 3.1        | 197343           | 1.57087E-05          |
| 2&3                              | 24.38      | 98688            | 0.000247041          |
| 2&4                              | 36.65      | 33517            | 0.001093475          |
| 2&5                              | 28.27      | 125505           | 0.00022525           |
| 2&6                              | 16.76      | 203289           | 8.24442E-05          |
| 3&4                              | 22.29      | 82317            | 0.000270782          |
| 3&5                              | 5.94       | 174305           | 3.40782E-05          |
| 3&6                              | 4.2        | 252028           | 1.66648E-05          |
| 4&5                              | 27.57      | 109134           | 0.000252625          |
| 4&6                              | 23.48      | 186918           | 0.000125617          |
| 5&6                              | 7.56       | 278906           | 2.71059E-05          |
|                                  |            |                  |                      |
| #Three feature class combination |            |                  |                      |
| Name of feature classes          | F-score(%) | Size of features | Average contribution |
| 1&2&3                            | 0.11       | 117686           | 9.34691E-07          |
| 1&2&4                            | 47.82      | 52515            | 0.000910597          |
| 1&2&5                            | 6.35       | 144503           | 4.39437E-05          |
| 1&2&6                            | 5.85       | 222287           | 2.63173E-05          |
| 1&3&4                            | 45.13      | 101315           | 0.000445442          |
| 1&3&5                            | 1.98       | 193303           | 1.0243E-05           |
| 1&3&6                            | 2.24       | 271087           | 8.26303E-06          |
| 1&4&5                            | 49.44      | 128132           | 0.000385852          |
| 1&4&6                            | 45.51      | 205916           | 0.000221012          |
| 1&5&6                            | 7.5        | 297904           | 2.51759E-05          |
| 2&3&4                            | 41.05      | 107261           | 0.000382711          |
| 2&3&5                            | 21.27      | 199249           | 0.000106751          |
| 2&3&6                            | 16.26      | 277033           | 5.86934E-05          |
| 2&4&5                            | 35.42      | 134078           | 0.000264175          |
| 2&4&6                            | 33.03      | 211862           | 0.000155903          |
| 2&5&6                            | 17.05      | 303850           | 5.61132E-05          |
| 3&4&5                            | 24.38      | 182878           | 0.000133313          |
| 3&4&6                            | 20.76      | 260662           | 7.96434E-05          |
| 3&5&6                            | 5.96       | 352650           | 1.69006E-05          |
| 4&5&6                            | 23.35      | 287479           | 8.12233E-05          |
|                                  |            |                  |                      |
| #Four feature class combination  |            |                  |                      |
| Name of feature classes          | F-score(%) | Size of features | Average contribution |
| 1&2&3&4                          | 49.16      | 126259           | 0.000389358          |
| 1&2&3&5                          | 7.02       | 218247           | 3.21654E-05          |
| 1&2&3&6                          | 5.77       | 296031           | 1.94912E-05          |

|                                        |            |                  |                      |
|----------------------------------------|------------|------------------|----------------------|
| 1&2&4&5                                | 50.71      | 153076           | 0.000331273          |
| 1&2&4&6                                | 48.82      | 230860           | 0.00021147           |
| 1&2&5&6                                | 15.47      | 322848           | 4.79173E-05          |
| 1&3&4&5                                | 49.74      | 201876           | 0.000246389          |
| 1&3&4&6                                | 46.7       | 279660           | 0.000166988          |
| 1&3&5&6                                | 7.48       | 371648           | 2.01266E-05          |
| 1&4&5&6                                | 46.73      | 306477           | 0.000152475          |
| 2&3&4&5                                | 38.12      | 377594           | 0.000100955          |
| 2&3&4&6                                | 36.33      | 285606           | 0.000127203          |
| 2&3&5&6                                | 16.96      | 377594           | 4.4916E-05           |
| 2&4&5&6                                | 32.47      | 312423           | 0.00010393           |
| 3&4&5&6                                | 21.13      | 361223           | 5.84957E-05          |
|                                        |            |                  |                      |
| <b>#Five feature class combination</b> |            |                  |                      |
| Name of feature classes                | F-score(%) | Size of features | Average contribution |
| 1&2&3&4&5                              | 51.34      | 226820           | 0.000226347          |
| 1&2&3&4&6                              | 50.19      | 304604           | 0.000164771          |
| 1&2&3&5&6                              | 16.37      | 396592           | 4.12767E-05          |
| 1&2&4&5&6                              | 49.9       | 331421           | 0.000150564          |
| 1&3&4&5&6                              | 47.1       | 380221           | 0.000123875          |
| 2&3&4&5&6                              | 34.22      | 386167           | 8.86145E-05          |
|                                        |            |                  |                      |
| <b>#Six feature class combination</b>  |            |                  |                      |
| Name of feature classes                | F-score(%) | Size of features | Average contribution |
| 1&2&3&4&5&6                            | 51.21      | 405165           | 0.000126393          |

**Table B2. Edge feature contribution with combination**

|                                         |            |                  |                      |
|-----------------------------------------|------------|------------------|----------------------|
| <b>#One feature class</b>               |            |                  |                      |
| Name of feature classes                 | F-score(%) | Size of features | Average contribution |
| 1                                       | 27.97      | 4313             | 0.00648505           |
| 2                                       | 0          | 25               | 0                    |
| 4                                       | 17.67      | 2593             | 0.0068145            |
| 5                                       | 18.45      | 441684           | 4.1772E-05           |
| 6                                       | 13.09      | 25038            | 0.00052281           |
| 7                                       | 7.83       | 33               | 0.23727273           |
| 8                                       | 23.03      | 4                | 5.7575               |
|                                         |            |                  |                      |
| <b>#Two feature class combination</b>   |            |                  |                      |
| Name of feature classes                 | F-score(%) | Size of features | Average contribution |
| 1&2                                     | 18.55      | 4338             | 0.00427616           |
| 1&4                                     | 24.17      | 6906             | 0.00349986           |
| 1&5                                     | 24.19      | 445997           | 5.4238E-05           |
| 1&6                                     | 22.09      | 29351            | 0.00075261           |
| 1&7                                     | 32.91      | 4346             | 0.00757248           |
| 1&8                                     | 23.46      | 4317             | 0.00543433           |
| 2&4                                     | 0          | 2618             | 0                    |
| 2&5                                     | 0          | 441709           | 0                    |
| 2&6                                     | 22.42      | 25063            | 0.00089455           |
| 2&7                                     | 0          | 58               | 0                    |
| 2&8                                     | 0          | 29               | 0                    |
| 4&5                                     | 27.15      | 444277           | 6.1111E-05           |
| 4&6                                     | 15.48      | 27631            | 0.00056024           |
| 4&7                                     | 14.68      | 2626             | 0.00559025           |
| 4&8                                     | 26.43      | 2597             | 0.01017713           |
| 5&6                                     | 13         | 466722           | 2.7854E-05           |
| 5&7                                     | 18.2       | 441717           | 4.1203E-05           |
| 5&8                                     | 27.42      | 441688           | 6.208E-05            |
| 6&7                                     | 10.84      | 25071            | 0.00043237           |
| 6&8                                     | 12.66      | 25042            | 0.00050555           |
| 7&8                                     | 5.06       | 37               | 0.13675676           |
|                                         |            |                  |                      |
| <b>#Three feature class combination</b> |            |                  |                      |
| Name of feature classes                 | F-score(%) | Size of features | Average contribution |
| 1&2&4                                   | 23.03      | 6931             | 0.00332275           |

|                                        |            |                  |                      |
|----------------------------------------|------------|------------------|----------------------|
| 1&2&5                                  | 31.98      | 446022           | 7.17E-05             |
| 1&2&6                                  | 44.2       | 29376            | 0.00150463           |
| 1&2&7                                  | 2.85       | 4371             | 0.00065202           |
| 1&2&8                                  | 25.69      | 4342             | 0.00591663           |
| 1&4&5                                  | 25.51      | 448590           | 5.6867E-05           |
| 1&4&6                                  | 19.4       | 31944            | 0.00060731           |
| 1&4&7                                  | 29.88      | 6939             | 0.0043061            |
| 1&4&8                                  | 24.43      | 6910             | 0.00353546           |
| 1&5&6                                  | 8.26       | 471035           | 1.7536E-05           |
| 1&5&7                                  | 22.66      | 446030           | 5.0804E-05           |
| 1&5&8                                  | 23.28      | 446001           | 5.2197E-05           |
| 1&6&7                                  | 24.5       | 29384            | 0.00083379           |
| 1&6&8                                  | 15.66      | 29355            | 0.00053347           |
| 1&7&8                                  | 18.74      | 4350             | 0.00430805           |
| 2&4&5                                  | 25.92      | 444302           | 5.8339E-05           |
| 2&4&6                                  | 30.53      | 27656            | 0.00110392           |
| 2&4&7                                  | 0          | 2651             | 0                    |
| 2&4&8                                  | 0          | 2622             | 0                    |
| 2&5&6                                  | 42.01      | 466747           | 9.0006E-05           |
| 2&5&7                                  | 3.4        | 441742           | 7.6968E-06           |
| 2&5&8                                  | 0          | 441713           | 0                    |
| 2&6&7                                  | 18.51      | 25096            | 0.00073757           |
| 2&6&8                                  | 18         | 25067            | 0.00071808           |
| 2&7&8                                  | 0          | 62               | 0                    |
| 4&5&6                                  | 8.84       | 469315           | 1.8836E-05           |
| 4&5&7                                  | 29.14      | 444310           | 6.5585E-05           |
| 4&5&8                                  | 30.45      | 444281           | 6.8538E-05           |
| 4&6&7                                  | 19.45      | 27664            | 0.00070308           |
| 4&6&8                                  | 17.25      | 27635            | 0.00062421           |
| 4&7&8                                  | 26.31      | 2630             | 0.0100038            |
| 5&6&7                                  | 14.26      | 466755           | 3.0551E-05           |
| 5&6&8                                  | 7.69       | 466726           | 1.6476E-05           |
| 5&7&8                                  | 28.11      | 441721           | 6.3637E-05           |
| 6&7&8                                  | 17.95      | 25075            | 0.00071585           |
|                                        |            |                  |                      |
| <b>#Four feature class combination</b> |            |                  |                      |
| Name of feature classes                | F-score(%) | Size of features | Average contribution |
| 1&2&4&5                                | 38.84      | 448615           | 8.6578E-05           |
| 1&2&4&6                                | 44.51      | 31969            | 0.00139229           |
| 1&2&4&7                                | 13.84      | 6964             | 0.00198736           |
| 1&2&4&8                                | 31.17      | 6935             | 0.00449459           |
| 1&2&5&6                                | 46.1       | 471060           | 9.7864E-05           |
| 1&2&5&7                                | 28.96      | 446055           | 6.4925E-05           |
| 1&2&5&8                                | 37.21      | 446026           | 8.3426E-05           |
| 1&2&6&7                                | 41.74      | 29409            | 0.00141929           |
| 1&2&6&8                                | 44.08      | 29380            | 0.00150034           |
| 1&2&7&8                                | 8.6        | 4375             | 0.00196571           |
| 1&4&5&6                                | 20.05      | 473628           | 4.2333E-05           |
| 1&4&5&7                                | 28.76      | 448623           | 6.4107E-05           |
| 1&4&5&8                                | 24.42      | 448594           | 5.4437E-05           |
| 1&4&6&7                                | 23.34      | 31977            | 0.0007299            |
| 1&4&6&8                                | 19.01      | 31948            | 0.00059503           |
| 1&4&7&8                                | 24.22      | 6943             | 0.00348841           |
| 1&5&6&7                                | 20.78      | 471068           | 4.4113E-05           |
| 1&5&6&8                                | 7.89       | 471039           | 1.675E-05            |
| 1&5&7&8                                | 18.84      | 446034           | 4.2239E-05           |
| 1&6&7&8                                | 1.8        | 29388            | 6.1249E-05           |
| 2&4&5&6                                | 46.13      | 469340           | 9.8287E-05           |
| 2&4&5&7                                | 8.18       | 444335           | 1.841E-05            |
| 2&4&5&8                                | 23.92      | 444306           | 5.3837E-05           |
| 2&4&6&7                                | 23.8       | 27689            | 0.00085955           |
| 2&4&6&8                                | 39.53      | 27660            | 0.00142914           |
| 2&4&7&8                                | 0          | 2655             | 0                    |
| 2&5&6&7                                | 35.26      | 466780           | 7.5539E-05           |
| 2&5&6&8                                | 47.42      | 466751           | 0.0001016            |

|                                         |            |                  |                      |
|-----------------------------------------|------------|------------------|----------------------|
| 2&5&7&8                                 | 0          | 441746           |                      |
| 2&6&7&8                                 | 10.19      | 25100            | 0.00040598           |
| 4&5&6&7                                 | 2.33       | 469348           | 4.9643E-06           |
| 4&5&6&8                                 | 17.78      | 469319           | 3.7885E-05           |
| 4&5&7&8                                 | 32.1       | 444314           | 7.2246E-05           |
| 4&6&7&8                                 | 6.24       | 27668            | 0.00022553           |
| 5&6&7&8                                 | 10.84      | 466759           | 2.3224E-05           |
|                                         |            |                  |                      |
| <b>#Five feature class combination</b>  |            |                  |                      |
| Name of feature classes                 | F-score(%) | Size of features | Average contribution |
| 1&2&4&5&6                               | 49.02      | 473653           | 0.00010349           |
| 1&2&4&5&7                               | 35.65      | 448648           | 7.9461E-05           |
| 1&2&4&5&8                               | 39.6       | 448619           | 8.8271E-05           |
| 1&2&4&6&7                               | 43.96      | 32002            | 0.00137366           |
| 1&2&4&6&8                               | 50.23      | 31973            | 0.00157101           |
| 1&2&4&7&8                               | 23.85      | 6968             | 0.00342279           |
| 1&2&5&6&7                               | 44.19      | 471093           | 9.3803E-05           |
| 1&2&5&6&8                               | 51.18      | 471064           | 0.00010865           |
| 1&2&5&7&8                               | 34.37      | 446059           | 7.7053E-05           |
| 1&2&6&7&8                               | 41.78      | 29413            | 0.00142046           |
| 1&4&5&6&7                               | 22.81      | 473661           | 4.8157E-05           |
| 1&4&5&6&8                               | 18.97      | 473632           | 4.0052E-05           |
| 1&4&5&7&8                               | 25.81      | 448627           | 5.7531E-05           |
| 1&4&6&7&8                               | 14.4       | 31981            | 0.00045027           |
| 1&5&6&7&8                               | 5.4        | 471072           | 1.1463E-05           |
| 2&4&5&6&7                               | 42.79      | 469373           | 9.1164E-05           |
| 2&4&5&6&8                               | 49.26      | 469344           | 0.00010496           |
| 2&4&5&7&8                               | 3.7        | 444339           | 8.327E-06            |
| 2&4&6&7&8                               | 26.31      | 27693            | 0.00095006           |
| 2&5&6&7&8                               | 44.17      | 466784           | 9.4626E-05           |
| 4&5&6&7&8                               | 11.28      | 469352           | 2.4033E-05           |
|                                         |            |                  |                      |
| <b>#Six feature class combination</b>   |            |                  |                      |
| Name of feature classes                 | F-score(%) | Size of features | Average contribution |
| 1&2&4&5&6&7                             | 47.29      | 473686           | 9.9834E-05           |
| 1&2&4&5&6&8                             | 51.81      | 473657           | 0.00010938           |
| 1&2&4&5&7&8                             | 36.85      | 448652           | 8.2135E-05           |
| 1&2&4&6&7&8                             | 50.33      | 32006            | 0.00157252           |
| 1&2&5&6&7&8                             | 51.29      | 471097           | 0.00010887           |
| 1&4&5&6&7&8                             | 14.22      | 473665           | 3.0021E-05           |
| 2&4&5&6&7&8                             | 48.32      | 469377           | 0.00010294           |
|                                         |            |                  |                      |
| <b>#Seven feature class combination</b> |            |                  | Average contribution |
| 1&2&4&5&6&7&8                           | 52.16      | 473690           | 0.000110114          |
|                                         |            |                  |                      |
| <b>#Eight feature class combination</b> |            |                  | Average contribution |
| 1&2&3&4&5&6&7&8                         | 51.21      | 477834           | 0.000107171          |

## *Appendix C*

### *(Quantitative algorithm for evaluating contribution of feature class)*

**Table C1. Testing combination with Trigger features with fixed Edge features**

|       | Rank | Fixed Trigger features<br>Testing combination with<br>Edge features | AEE1(1) | AEE1(2) | AEE1(3) | AEE1(4) | AEE1(5) | AEE1(6) |
|-------|------|---------------------------------------------------------------------|---------|---------|---------|---------|---------|---------|
| 51.34 | 1    | 1&2&3&4&5                                                           | 1       | 1       | 1       | 1       | 1       | 0       |
| 51.21 | 2    | 1&2&3&4&5&6                                                         | 1       | 1       | 1       | 1       | 1       | 0.5     |
| 50.71 | 3    | 1&2&4&5                                                             | 1       | 1       | 0.667   | 1       | 1       | 0.3333  |
| 50.19 | 4    | 1&2&3&4&6                                                           | 1       | 1       | 0.75    | 1       | 0.75    | 0.5     |
| 49.9  | 5    | 1&2&4&5&6                                                           | 1       | 1       | 0.6     | 1       | 0.8     | 0.6     |
| 49.74 | 6    | 1&3&4&5                                                             | 1       | 0.8333  | 0.667   | 1       | 0.833   | 0.5     |
| 49.44 | 7    | 1&4&5                                                               | 1       | 0.7143  | 0.571   | 1       | 0.857   | 0.4286  |
| 49.16 | 8    | 1&2&3&4                                                             | 1       | 0.75    | 0.625   | 1       | 0.75    | 0.375   |
| 48.82 | 9    | 1&2&4&6                                                             | 1       | 0.7778  | 0.556   | 1       | 0.667   | 0.4444  |
| 47.82 | 10   | 1&2&4                                                               | 1       | 0.8     | 0.5     | 1       | 0.6     | 0.4     |
| 47.1  | 11   | 1&3&4&5&6                                                           | 1       | 0.7273  | 0.545   | 1       | 0.636   | 0.4545  |
| 46.73 | 12   | 1&4&5&6                                                             | 1       | 0.6667  | 0.5     | 1       | 0.667   | 0.5     |
| 46.7  | 13   | 1&3&4&6                                                             | 1       | 0.6154  | 0.538   | 1       | 0.615   | 0.5385  |
| 45.51 | 14   | 1&4&6                                                               | 1       | 0.5714  | 0.5     | 1       | 0.571   | 0.5714  |
| 45.39 | 15   | 1&4                                                                 | 1       | 0.5333  | 0.467   | 1       | 0.533   | 0.5333  |
| 45.13 | 16   | 1&3&4                                                               | 1       | 0.5     | 0.5     | 1       | 0.5     | 0.5     |
| 42.05 | 17   | 2                                                                   | 0.941   | 0.5294  | 0.471   | 0.941   | 0.471   | 0.4706  |
| 41.05 | 18   | 2&3&4                                                               | 0.889   | 0.5556  | 0.5     | 0.944   | 0.444   | 0.4444  |
| 38.12 | 19   | 2&3&4&5                                                             | 0.842   | 0.5789  | 0.526   | 0.947   | 0.474   | 0.4211  |
| 36.65 | 20   | 2&4                                                                 | 0.8     | 0.6     | 0.5     | 0.95    | 0.45    | 0.4     |
| 36.33 | 21   | 2&3&4&6                                                             | 0.762   | 0.619   | 0.524   | 0.952   | 0.429   | 0.4286  |
| 35.42 | 22   | 2&4&5                                                               | 0.727   | 0.6364  | 0.5     | 0.955   | 0.455   | 0.4091  |
| 34.22 | 23   | 2&3&4&5&6                                                           | 0.696   | 0.6522  | 0.522   | 0.957   | 0.478   | 0.4348  |
| 33.03 | 24   | 2&4&6                                                               | 0.667   | 0.6667  | 0.5     | 0.958   | 0.458   | 0.4583  |
| 32.47 | 25   | 2&4&5&6                                                             | 0.64    | 0.68    | 0.48    | 0.96    | 0.48    | 0.48    |
| 28.27 | 26   | 2&5                                                                 | 0.615   | 0.6923  | 0.462   | 0.923   | 0.5     | 0.4615  |
| 27.57 | 27   | 4&5                                                                 | 0.593   | 0.6667  | 0.444   | 0.926   | 0.519   | 0.4444  |
| 27.11 | 28   | 4                                                                   | 0.571   | 0.6429  | 0.429   | 0.929   | 0.5     | 0.4286  |
| 24.38 | 29   | 2&3                                                                 | 0.552   | 0.6552  | 0.448   | 0.897   | 0.483   | 0.4138  |
| 24.38 | 30   | 3&4&5                                                               | 0.533   | 0.6333  | 0.467   | 0.9     | 0.5     | 0.4     |
| 23.48 | 31   | 4&6                                                                 | 0.516   | 0.6129  | 0.452   | 0.903   | 0.484   | 0.4194  |
| 23.35 | 32   | 4&5&6                                                               | 0.5     | 0.5938  | 0.438   | 0.906   | 0.5     | 0.4375  |
| 22.29 | 33   | 3&4                                                                 | 0.485   | 0.5758  | 0.455   | 0.909   | 0.485   | 0.4242  |
| 21.27 | 34   | 2&3&5                                                               | 0.471   | 0.5882  | 0.471   | 0.882   | 0.5     | 0.4118  |
| 21.13 | 35   | 3&4&5&6                                                             | 0.457   | 0.5714  | 0.486   | 0.886   | 0.514   | 0.4286  |
| 20.76 | 36   | 3&4&6                                                               | 0.444   | 0.5556  | 0.5     | 0.889   | 0.5     | 0.4444  |
| 17.05 | 37   | 2&5&6                                                               | 0.432   | 0.5676  | 0.486   | 0.865   | 0.514   | 0.4595  |
| 16.96 | 38   | 2&3&5&6                                                             | 0.421   | 0.5789  | 0.5     | 0.842   | 0.526   | 0.4737  |
| 16.76 | 39   | 2&6                                                                 | 0.41    | 0.5897  | 0.487   | 0.821   | 0.513   | 0.4872  |
| 16.37 | 40   | 1&2&3&5&6                                                           | 0.425   | 0.6     | 0.5     | 0.8     | 0.525   | 0.5     |
| 16.26 | 41   | 2&3&6                                                               | 0.415   | 0.6098  | 0.512   | 0.78    | 0.512   | 0.5122  |
| 15.47 | 42   | 1&2&5&6                                                             | 0.429   | 0.619   | 0.5     | 0.762   | 0.524   | 0.5238  |
| 7.56  | 43   | 5&6                                                                 | 0.419   | 0.6047  | 0.488   | 0.744   | 0.535   | 0.5349  |
| 7.5   | 44   | 1&5&6                                                               | 0.432   | 0.5909  | 0.477   | 0.727   | 0.545   | 0.5455  |
| 7.48  | 45   | 1&3&5&6                                                             | 0.444   | 0.5778  | 0.489   | 0.711   | 0.556   | 0.5556  |
| 7.33  | 46   | 5                                                                   | 0.435   | 0.5652  | 0.478   | 0.696   | 0.565   | 0.5435  |
| 7.02  | 47   | 1&2&3&5                                                             | 0.447   | 0.5745  | 0.489   | 0.681   | 0.574   | 0.5319  |
| 6.35  | 48   | 1&2&5                                                               | 0.458   | 0.5833  | 0.479   | 0.667   | 0.583   | 0.5208  |
| 5.96  | 49   | 3&5&6                                                               | 0.449   | 0.5714  | 0.49    | 0.653   | 0.592   | 0.5306  |
| 5.94  | 50   | 3&5                                                                 | 0.44    | 0.56    | 0.5     | 0.64    | 0.6     | 0.52    |
| 5.85  | 51   | 1&2&6                                                               | 0.451   | 0.5686  | 0.49    | 0.627   | 0.588   | 0.5294  |
| 5.77  | 52   | 1&2&3&6                                                             | 0.462   | 0.5769  | 0.5     | 0.615   | 0.577   | 0.5385  |
| 5.48  | 53   | 6                                                                   | 0.453   | 0.566   | 0.491   | 0.604   | 0.566   | 0.5472  |

|      |    |                        |       |        |       |       |       |        |
|------|----|------------------------|-------|--------|-------|-------|-------|--------|
| 4.2  | 54 | 3&6                    | 0.444 | 0.5556 | 0.5   | 0.593 | 0.556 | 0.5556 |
| 3.5  | 55 | 3                      | 0.436 | 0.5455 | 0.509 | 0.582 | 0.545 | 0.5455 |
| 3.1  | 56 | 1&6                    | 0.446 | 0.5357 | 0.5   | 0.571 | 0.536 | 0.5536 |
| 2.24 | 57 | 1&3&6                  | 0.456 | 0.5263 | 0.509 | 0.561 | 0.526 | 0.5614 |
| 1.98 | 58 | 1&3&5                  | 0.466 | 0.5172 | 0.517 | 0.552 | 0.534 | 0.5517 |
| 0.91 | 59 | 1&5                    | 0.475 | 0.5085 | 0.508 | 0.542 | 0.542 | 0.5424 |
| 0.11 | 60 | 1&2&3                  | 0.483 | 0.5167 | 0.517 | 0.533 | 0.533 | 0.5333 |
| 0    | 61 | 1                      | 0.492 | 0.5082 | 0.508 | 0.525 | 0.525 | 0.5246 |
| 0    | 62 | 1&2                    | 0.5   | 0.5161 | 0.5   | 0.516 | 0.516 | 0.5161 |
| 0    | 63 | 1&3                    | 0.508 | 0.5079 | 0.508 | 0.508 | 0.508 | 0.5079 |
|      |    | AEE1 value computation | 40.83 | 39.938 | 32.99 | 52.23 | 36.12 | 30.086 |

**Table C2. Testing combination with Edge features with fixed Trigger features**

| F-score (%) | Rank | Fixed Trigger features<br>Testing combination with<br>Edge features | AEE1(1) | AEE1(2) | AEE1(4) | AEE1(5) | AEE1(6) | AEE1(7) | AEE1(8) |
|-------------|------|---------------------------------------------------------------------|---------|---------|---------|---------|---------|---------|---------|
|             |      |                                                                     |         |         |         |         |         |         |         |
| 52.16       | 1    | 1&2&4&5&6&7&8                                                       | 1       | 1       | 1       | 1       | 1       | 1       | 1       |
| 51.81       | 2    | 1&2&4&5&6&8                                                         | 1       | 1       | 1       | 1       | 1       | 0.5     | 1       |
| 51.29       | 3    | 1&2&5&6&7&8                                                         | 1       | 1       | 0.6667  | 1       | 1       | 0.66667 | 1       |
| 51.18       | 4    | 1&2&5&6&8                                                           | 1       | 1       | 0.5     | 1       | 1       | 0.5     | 1       |
| 50.33       | 5    | 1&2&4&6&7&8                                                         | 1       | 1       | 0.6     | 0.8     | 1       | 0.6     | 1       |
| 50.23       | 6    | 1&2&4&6&8                                                           | 1       | 1       | 0.6667  | 0.6667  | 1       | 0.5     | 1       |
| 49.26       | 7    | 2&4&5&6&8                                                           | 0.85714 | 1       | 0.7143  | 0.7143  | 1       | 0.42857 | 1       |
| 49.02       | 8    | 1&2&4&5&6                                                           | 0.875   | 1       | 0.75    | 0.75    | 1       | 0.375   | 0.875   |
| 48.32       | 9    | 2&4&5&6&7&8                                                         | 0.77778 | 1       | 0.7778  | 0.7778  | 1       | 0.44444 | 0.8889  |
| 47.42       | 10   | 2&5&6&8                                                             | 0.7     | 1       | 0.7     | 0.8     | 1       | 0.4     | 0.9     |
| 47.29       | 11   | 1&2&4&5&6&7                                                         | 0.72727 | 1       | 0.7273  | 0.8182  | 1       | 0.45455 | 0.8182  |
| 46.13       | 12   | 2&4&5&6                                                             | 0.66667 | 1       | 0.75    | 0.8333  | 1       | 0.41667 | 0.75    |
| 46.1        | 13   | 1&2&5&6                                                             | 0.69231 | 1       | 0.6923  | 0.8462  | 1       | 0.38462 | 0.6923  |
| 44.51       | 14   | 1&2&4&6                                                             | 0.71429 | 1       | 0.7143  | 0.7857  | 1       | 0.35714 | 0.6429  |
| 44.2        | 15   | 1&2&6                                                               | 0.73333 | 1       | 0.6667  | 0.7333  | 1       | 0.33333 | 0.6     |
| 44.19       | 16   | 1&2&5&6&7                                                           | 0.75    | 1       | 0.625   | 0.75    | 1       | 0.375   | 0.5625  |
| 44.17       | 17   | 2&5&6&7&8                                                           | 0.70588 | 1       | 0.5882  | 0.7647  | 1       | 0.41176 | 0.5882  |
| 44.08       | 18   | 1&2&6&8                                                             | 0.72222 | 1       | 0.5556  | 0.7222  | 1       | 0.38889 | 0.6111  |
| 43.96       | 19   | 1&2&4&6&7                                                           | 0.73684 | 1       | 0.5789  | 0.6842  | 1       | 0.42105 | 0.5789  |
| 42.79       | 20   | 2&4&5&6&7                                                           | 0.7     | 1       | 0.6     | 0.7     | 1       | 0.45    | 0.55    |
| 42.01       | 21   | 2&5&6                                                               | 0.66667 | 1       | 0.5714  | 0.7143  | 1       | 0.42857 | 0.5238  |
| 41.78       | 22   | 1&2&6&7&8                                                           | 0.68182 | 1       | 0.5455  | 0.6818  | 1       | 0.45455 | 0.5455  |
| 41.74       | 23   | 1&2&6&7                                                             | 0.69565 | 1       | 0.5217  | 0.6522  | 1       | 0.47826 | 0.5217  |
| 39.6        | 24   | 1&2&4&5&8                                                           | 0.70833 | 1       | 0.5417  | 0.6667  | 0.95833 | 0.45833 | 0.5417  |
| 39.53       | 25   | 2&4&6&8                                                             | 0.68    | 1       | 0.56    | 0.64    | 0.96    | 0.44    | 0.56    |
| 38.84       | 26   | 1&2&4&5                                                             | 0.69231 | 1       | 0.5769  | 0.6538  | 0.92308 | 0.42308 | 0.5385  |
| 37.21       | 27   | 1&2&5&8                                                             | 0.7037  | 1       | 0.5556  | 0.6667  | 0.88889 | 0.40741 | 0.5556  |
| 36.85       | 28   | 1&2&4&5&7&8                                                         | 0.71429 | 1       | 0.5714  | 0.6786  | 0.85714 | 0.42857 | 0.5714  |
| 35.65       | 29   | 1&2&4&5&7                                                           | 0.72414 | 1       | 0.5862  | 0.6897  | 0.82759 | 0.44828 | 0.5517  |
| 35.26       | 30   | 2&5&6&7                                                             | 0.7     | 1       | 0.5667  | 0.7     | 0.83333 | 0.46667 | 0.5333  |
| 34.37       | 31   | 1&2&5&7&8                                                           | 0.70968 | 1       | 0.5484  | 0.7097  | 0.80645 | 0.48387 | 0.5484  |
| 32.91       | 32   | 1&7                                                                 | 0.71875 | 0.9688  | 0.5313  | 0.6875  | 0.78125 | 0.5     | 0.5313  |
| 32.1        | 33   | 4&5&7&8                                                             | 0.69697 | 0.9394  | 0.5455  | 0.697   | 0.75758 | 0.51515 | 0.5455  |
| 31.98       | 34   | 1&2&5                                                               | 0.70588 | 0.9412  | 0.5294  | 0.7059  | 0.73529 | 0.5     | 0.5294  |
| 31.17       | 35   | 1&2&4&8                                                             | 0.71429 | 0.9429  | 0.5429  | 0.6857  | 0.71429 | 0.48571 | 0.5429  |
| 30.53       | 36   | 2&4&6                                                               | 0.69444 | 0.9444  | 0.5556  | 0.6667  | 0.72222 | 0.47222 | 0.5278  |
| 30.45       | 37   | 4&5&8                                                               | 0.67568 | 0.9189  | 0.5676  | 0.6757  | 0.7027  | 0.45946 | 0.5405  |
| 29.88       | 38   | 1&4&7                                                               | 0.68421 | 0.8947  | 0.5789  | 0.6579  | 0.68421 | 0.47368 | 0.5263  |
| 29.14       | 39   | 4&5&7                                                               | 0.66667 | 0.8718  | 0.5897  | 0.6667  | 0.66667 | 0.48718 | 0.5128  |
| 28.96       | 40   | 1&2&5&7                                                             | 0.675   | 0.875   | 0.575   | 0.675   | 0.65    | 0.5     | 0.5     |
| 28.76       | 41   | 1&4&5&7                                                             | 0.68293 | 0.8537  | 0.5854  | 0.6829  | 0.63415 | 0.5122  | 0.4878  |
| 28.11       | 42   | 5&7&8                                                               | 0.66667 | 0.8333  | 0.5714  | 0.6905  | 0.61905 | 0.52381 | 0.5     |
| 27.97       | 43   | 1                                                                   | 0.67442 | 0.814   | 0.5581  | 0.6744  | 0.60465 | 0.51163 | 0.4884  |
| 27.42       | 44   | 5&8                                                                 | 0.65909 | 0.7955  | 0.5455  | 0.6818  | 0.59091 | 0.5     | 0.5     |
| 27.15       | 45   | 4&5                                                                 | 0.64444 | 0.7778  | 0.5556  | 0.6889  | 0.57778 | 0.48889 | 0.4889  |
| 26.43       | 46   | 4&8                                                                 | 0.63043 | 0.7609  | 0.5652  | 0.6739  | 0.56522 | 0.47826 | 0.5     |
| 26.31       | 47   | 4&7&8                                                               | 0.61702 | 0.7447  | 0.5745  | 0.6596  | 0.55319 | 0.48936 | 0.5106  |
| 26.31       | 48   | 2&4&6&7&8                                                           | 0.60417 | 0.75    | 0.5833  | 0.6458  | 0.5625  | 0.5     | 0.5208  |
| 25.92       | 49   | 2&4&5                                                               | 0.59184 | 0.7551  | 0.5918  | 0.6531  | 0.55102 | 0.4898  | 0.5102  |
| 25.81       | 50   | 1&4&5&7&8                                                           | 0.6     | 0.74    | 0.6     | 0.66    | 0.54    | 0.5     | 0.52    |



|       |     |             |         |        |        |        |         |         |        |
|-------|-----|-------------|---------|--------|--------|--------|---------|---------|--------|
| 25.69 | 51  | 1&2&8       | 0.60784 | 0.7451 | 0.5882 | 0.6471 | 0.52941 | 0.4902  | 0.5294 |
| 25.51 | 52  | 1&4&5       | 0.61538 | 0.7308 | 0.5962 | 0.6538 | 0.51923 | 0.48077 | 0.5192 |
| 24.5  | 53  | 1&6&7       | 0.62264 | 0.717  | 0.5849 | 0.6415 | 0.5283  | 0.49057 | 0.5094 |
| 24.43 | 54  | 1&4&8       | 0.62963 | 0.7037 | 0.5926 | 0.6296 | 0.51852 | 0.48148 | 0.5185 |
| 24.42 | 55  | 1&4&5&8     | 0.63636 | 0.6909 | 0.6    | 0.6364 | 0.50909 | 0.47273 | 0.5273 |
| 24.22 | 56  | 1&4&7&8     | 0.64286 | 0.6786 | 0.6071 | 0.625  | 0.5     | 0.48214 | 0.5357 |
| 24.19 | 57  | 1&5         | 0.64912 | 0.6667 | 0.5965 | 0.6316 | 0.49123 | 0.47368 | 0.5263 |
| 24.17 | 58  | 1&4         | 0.65517 | 0.6552 | 0.6034 | 0.6207 | 0.48276 | 0.46552 | 0.5172 |
| 23.92 | 59  | 2&4&5&8     | 0.64407 | 0.661  | 0.6102 | 0.6271 | 0.47458 | 0.45763 | 0.5254 |
| 23.85 | 60  | 1&2&4&7&8   | 0.65    | 0.6667 | 0.6167 | 0.6167 | 0.46667 | 0.46667 | 0.5333 |
| 23.8  | 61  | 2&4&6&7     | 0.63934 | 0.6721 | 0.623  | 0.6066 | 0.47541 | 0.47541 | 0.5246 |
| 23.46 | 62  | 1&8         | 0.64516 | 0.6613 | 0.6129 | 0.5968 | 0.46774 | 0.46774 | 0.5323 |
| 23.34 | 63  | 1&4&6&7     | 0.65079 | 0.6508 | 0.619  | 0.5873 | 0.47619 | 0.47619 | 0.5238 |
| 23.28 | 64  | 1&5&8       | 0.65625 | 0.6406 | 0.6094 | 0.5938 | 0.46875 | 0.46875 | 0.5313 |
| 23.03 | 65  | 8           | 0.64615 | 0.6308 | 0.6    | 0.5846 | 0.46154 | 0.46154 | 0.5385 |
| 23.03 | 66  | 1&2&4       | 0.65152 | 0.6364 | 0.6061 | 0.5758 | 0.45455 | 0.45455 | 0.5303 |
| 22.81 | 67  | 1&4&5&6&7   | 0.65672 | 0.6269 | 0.6119 | 0.5821 | 0.46269 | 0.46269 | 0.5224 |
| 22.66 | 68  | 1&5&7       | 0.66176 | 0.6176 | 0.6029 | 0.5882 | 0.45588 | 0.47059 | 0.5147 |
| 22.42 | 69  | 2&6         | 0.65217 | 0.6232 | 0.5942 | 0.5797 | 0.46377 | 0.46377 | 0.5072 |
| 22.09 | 70  | 1&6         | 0.65714 | 0.6143 | 0.5857 | 0.5714 | 0.47143 | 0.45714 | 0.5    |
| 20.78 | 71  | 1&5&6&7     | 0.66197 | 0.6056 | 0.5775 | 0.5775 | 0.47887 | 0.46479 | 0.493  |
| 20.05 | 72  | 1&4&5&6     | 0.66667 | 0.5972 | 0.5833 | 0.5833 | 0.48611 | 0.45833 | 0.4861 |
| 19.45 | 73  | 4&6&7       | 0.65753 | 0.589  | 0.589  | 0.5753 | 0.49315 | 0.46575 | 0.4795 |
| 19.4  | 74  | 1&4&6       | 0.66216 | 0.5811 | 0.5946 | 0.5676 | 0.5     | 0.45946 | 0.473  |
| 19.01 | 75  | 1&4&6&8     | 0.66667 | 0.5733 | 0.6    | 0.56   | 0.50667 | 0.45333 | 0.48   |
| 18.97 | 76  | 1&4&5&6&8   | 0.67105 | 0.5658 | 0.6053 | 0.5658 | 0.51316 | 0.44737 | 0.4868 |
| 18.84 | 77  | 1&5&7&8     | 0.67532 | 0.5584 | 0.5974 | 0.5714 | 0.50649 | 0.45455 | 0.4935 |
| 18.74 | 78  | 1&7&8       | 0.67949 | 0.5513 | 0.5897 | 0.5641 | 0.5     | 0.46154 | 0.5    |
| 18.55 | 79  | 1&2         | 0.68354 | 0.557  | 0.5823 | 0.557  | 0.49367 | 0.4557  | 0.4937 |
| 18.51 | 80  | 2&6&7       | 0.675   | 0.5625 | 0.575  | 0.55   | 0.5     | 0.4625  | 0.4875 |
| 18.45 | 81  | 5           | 0.66667 | 0.5556 | 0.5679 | 0.5556 | 0.49383 | 0.45679 | 0.4815 |
| 18.2  | 82  | 5&7         | 0.65854 | 0.5488 | 0.561  | 0.561  | 0.4878  | 0.46341 | 0.4756 |
| 18    | 83  | 2&6&8       | 0.6506  | 0.5542 | 0.5542 | 0.5542 | 0.49398 | 0.45783 | 0.4819 |
| 17.95 | 84  | 6&7&8       | 0.64286 | 0.5476 | 0.5476 | 0.5476 | 0.5     | 0.46429 | 0.4881 |
| 17.78 | 85  | 4&5&6&8     | 0.63529 | 0.5412 | 0.5529 | 0.5529 | 0.50588 | 0.45882 | 0.4941 |
| 17.67 | 86  | 4           | 0.62791 | 0.5349 | 0.5581 | 0.5465 | 0.5     | 0.45349 | 0.4884 |
| 17.25 | 87  | 4&6&8       | 0.62069 | 0.5287 | 0.5632 | 0.5402 | 0.50575 | 0.44828 | 0.4943 |
| 15.66 | 88  | 1&6&8       | 0.625   | 0.5227 | 0.5568 | 0.5341 | 0.51136 | 0.44318 | 0.5    |
| 15.48 | 89  | 4&6         | 0.61798 | 0.5169 | 0.5618 | 0.5281 | 0.51685 | 0.4382  | 0.4944 |
| 14.68 | 90  | 4&7         | 0.61111 | 0.5111 | 0.5667 | 0.5222 | 0.51111 | 0.44444 | 0.4889 |
| 14.4  | 91  | 1&4&6&7&8   | 0.61538 | 0.5055 | 0.5714 | 0.5165 | 0.51648 | 0.45055 | 0.4945 |
| 14.26 | 92  | 5&6&7       | 0.6087  | 0.5    | 0.5652 | 0.5217 | 0.52174 | 0.45652 | 0.4891 |
| 14.22 | 93  | 1&4&5&6&7&8 | 0.6129  | 0.4946 | 0.5699 | 0.5269 | 0.52688 | 0.46237 | 0.4946 |
| 13.84 | 94  | 1&2&4&7     | 0.61702 | 0.5    | 0.5745 | 0.5213 | 0.52128 | 0.46809 | 0.4894 |
| 13.09 | 95  | 6           | 0.61053 | 0.4947 | 0.5684 | 0.5158 | 0.52632 | 0.46316 | 0.4842 |
| 13    | 96  | 5&6         | 0.60417 | 0.4896 | 0.5625 | 0.5208 | 0.53125 | 0.45833 | 0.4792 |
| 12.66 | 97  | 6&8         | 0.59794 | 0.4845 | 0.5567 | 0.5155 | 0.53608 | 0.45361 | 0.4845 |
| 11.28 | 98  | 4&5&6&7&8   | 0.59184 | 0.4796 | 0.5612 | 0.5204 | 0.54082 | 0.45918 | 0.4898 |
| 10.84 | 99  | 6&7         | 0.58586 | 0.4747 | 0.5556 | 0.5152 | 0.54545 | 0.46465 | 0.4848 |
| 10.84 | 100 | 5&6&7&8     | 0.58    | 0.47   | 0.55   | 0.52   | 0.55    | 0.47    | 0.49   |
| 10.19 | 101 | 2&6&7&8     | 0.57426 | 0.4752 | 0.5446 | 0.5149 | 0.55446 | 0.47525 | 0.495  |
| 8.84  | 102 | 4&5&6       | 0.56863 | 0.4706 | 0.549  | 0.5196 | 0.55882 | 0.47059 | 0.4902 |
| 8.6   | 103 | 1&2&7&8     | 0.57282 | 0.4757 | 0.5437 | 0.5146 | 0.5534  | 0.47573 | 0.4951 |
| 8.26  | 104 | 1&5&6       | 0.57692 | 0.4712 | 0.5385 | 0.5192 | 0.55769 | 0.47115 | 0.4904 |
| 8.18  | 105 | 2&4&5&7     | 0.57143 | 0.4762 | 0.5429 | 0.5238 | 0.55238 | 0.47619 | 0.4857 |
| 7.89  | 106 | 1&5&6&8     | 0.57547 | 0.4717 | 0.5377 | 0.5283 | 0.5566  | 0.4717  | 0.4906 |
| 7.83  | 107 | 7           | 0.57009 | 0.4673 | 0.5327 | 0.5234 | 0.5514  | 0.47664 | 0.486  |
| 7.69  | 108 | 5&6&8       | 0.56481 | 0.463  | 0.5278 | 0.5278 | 0.55556 | 0.47222 | 0.4907 |
| 6.24  | 109 | 4&6&7&8     | 0.55963 | 0.4587 | 0.5321 | 0.5229 | 0.55963 | 0.47706 | 0.4954 |
| 5.4   | 110 | 1&5&6&7&8   | 0.56364 | 0.4545 | 0.5273 | 0.5273 | 0.56364 | 0.48182 | 0.5    |
| 5.06  | 111 | 7&8         | 0.55856 | 0.4505 | 0.5225 | 0.5225 | 0.55856 | 0.48649 | 0.5045 |
| 3.7   | 112 | 2&4&5&7&8   | 0.55357 | 0.4554 | 0.5268 | 0.5268 | 0.55357 | 0.49107 | 0.5089 |
| 3.4   | 113 | 2&5&7       | 0.54867 | 0.4602 | 0.5221 | 0.531  | 0.54867 | 0.49558 | 0.5044 |
| 2.85  | 114 | 1&2&7       | 0.55263 | 0.4649 | 0.5175 | 0.5263 | 0.54386 | 0.5     | 0.5    |
| 2.33  | 115 | 4&5&6&7     | 0.54783 | 0.4609 | 0.5217 | 0.5304 | 0.54783 | 0.50435 | 0.4957 |
| 1.8   | 116 | 1&6&7&8     | 0.55172 | 0.4569 | 0.5172 | 0.5259 | 0.55172 | 0.50862 | 0.5    |
| 0     | 117 | 2           | 0.54701 | 0.4615 | 0.5128 | 0.5214 | 0.54701 | 0.50427 | 0.4957 |

|   |     |                        |         |        |        |        |         |         |        |
|---|-----|------------------------|---------|--------|--------|--------|---------|---------|--------|
| 0 | 118 | 2&4                    | 0.54237 | 0.4661 | 0.5169 | 0.5169 | 0.54237 | 0.5     | 0.4915 |
| 0 | 119 | 2&5                    | 0.53782 | 0.4706 | 0.5126 | 0.521  | 0.53782 | 0.4958  | 0.4874 |
| 0 | 120 | 2&7                    | 0.53333 | 0.475  | 0.5083 | 0.5167 | 0.53333 | 0.5     | 0.4833 |
| 0 | 121 | 2&8                    | 0.52893 | 0.4793 | 0.5041 | 0.5124 | 0.52893 | 0.49587 | 0.4876 |
| 0 | 122 | 2&4&8                  | 0.52459 | 0.4836 | 0.5082 | 0.5082 | 0.52459 | 0.4918  | 0.4918 |
| 0 | 123 | 2&5&8                  | 0.52033 | 0.4878 | 0.5041 | 0.5122 | 0.52033 | 0.4878  | 0.4959 |
| 0 | 124 | 2&7&8                  | 0.51613 | 0.4919 | 0.5    | 0.5081 | 0.51613 | 0.49194 | 0.5    |
| 0 | 125 | 2&4&7                  | 0.512   | 0.496  | 0.504  | 0.504  | 0.512   | 0.496   | 0.496  |
| 0 | 126 | 2&4&7&8                | 0.50794 | 0.5    | 0.5079 | 0.5    | 0.50794 | 0.5     | 0.5    |
| 0 | 127 | 2&5&7&8                | 0.50394 | 0.5039 | 0.5039 | 0.5039 | 0.50394 | 0.50394 | 0.5039 |
|   |     | AEE1 value computation | 77.5994 | 83.84  | 68.451 | 74.877 | 77.7612 | 56.0854 | 66.347 |

## Appendix D

### (Feature combination experiment with modified features)

**Table D1. The combination experiment after choosing modified features in Trigger detection**

|                                           | Original   | 4'         | 6'                | 4' & 6'              |
|-------------------------------------------|------------|------------|-------------------|----------------------|
| <b>Title:Trigger_Features_Combination</b> |            | <b>ft</b>  | <b>some-chain</b> | <b>Some-chain-ft</b> |
| <b>Trigger-c</b>                          | 200000     | 250000     | 200000            | 250000               |
| <b>Edge-c</b>                             | 28000      | 28000      | 28000             | 28000                |
| <b>Beta</b>                               | 0.65       | 0.7        | 0.65              | 0.65                 |
| <b># One Feature class</b>                |            |            |                   |                      |
| Name                                      | F-score(%) | F-score(%) | F-score(%)        | F-score(%)           |
| 1                                         | 0          | 0          | 0                 | 0                    |
| 2                                         | 42.05      | 37.11      | 40.49             | 40.5                 |
| 3                                         | 3.5        | 3.16       | 3.67              | 3.67                 |
| 4                                         | 27.11      | 29.25      | 28.36             | 28.43                |
| 5                                         | 7.33       | 7.43       | 11.29             | 11.29                |
| 6                                         | 5.48       | 5.15       | 3.05              | 3.05                 |
| <b># Two feature class Combination</b>    |            |            |                   |                      |
| Name of feature classes                   | F-score(%) | F-score(%) | F-score(%)        | F-score(%)           |
| 1&2                                       | 0          | 0          | 0                 | 0                    |
| 1&3                                       | 0          | 0.11       | 0.22              | 0.22                 |
| 1&4                                       | 45.39      | 46.09      | 44.97             | 44.95                |
| 1&5                                       | 0.91       | 1          | 6.16              | 6.16                 |
| 1&6                                       | 3.1        | 3.52       | 0.22              | 0.22                 |
| 2&3                                       | 24.38      | 18.11      | 15.4              | 15.35                |
| 2&4                                       | 36.65      | 39.57      | 37.8              | 37.85                |
| 2&5                                       | 28.27      | 21.8       | 20.36             | 20.35                |
| 2&6                                       | 16.76      | 13.28      | 10.37             | 10.36                |
| 3&4                                       | 22.29      | 23.26      | 22.04             | 21.99                |
| 3&5                                       | 5.94       | 5.34       | 6.99              | 6.97                 |
| 3&6                                       | 4.2        | 4.24       | 2.8               | 2.79                 |
| 4&5                                       | 27.57      | 29.2       | 25.35             | 25.35                |
| 4&6                                       | 23.48      | 23.71      | 28.8              | 28.8                 |
| 5&6                                       | 7.56       | 7.33       | 8.05              | 8.06                 |
| <b># Three feature class Combination</b>  |            |            |                   |                      |
| Name of feature classes                   | F-score(%) | F-score(%) | F-score(%)        | F-score(%)           |
| 1&2&3                                     | 0.11       | 0.11       | 0.22              | 0.22                 |
| 1&2&4                                     | 47.82      | 47.45      | 47.04             | 47.07                |
| 1&2&5                                     | 6.35       | 4.05       | 11.34             | 11.34                |
| 1&2&6                                     | 5.85       | 4.35       | 1.2               | 1.2                  |
| 1&3&4                                     | 45.13      | 46.53      | 46.05             | 46.05                |
| 1&3&5                                     | 1.98       | 2.43       | 7.41              | 7.41                 |
| 1&3&6                                     | 2.24       | 2.01       | 1.13              | 1.13                 |
| 1&4&5                                     | 49.44      | 49.66      | 47.81             | 47.76                |
| 1&4&6                                     | 45.51      | 46.2       | 46.92             | 47                   |
| 1&5&6                                     | 7.5        | 8.02       | 6                 | 6                    |
| 2&3&4                                     | 41.05      | 42.26      | 38.23             | 38.27                |
| 2&3&5                                     | 21.27      | 16.66      | 17.24             | 17.21                |
| 2&3&6                                     | 16.26      | 13.72      | 9.98              | 9.99                 |
| 2&4&5                                     | 35.42      | 37.17      | 33.57             | 33.58                |
| 2&4&6                                     | 33.03      | 34.47      | 37.4              | 37.43                |
| 2&5&6                                     | 17.05      | 13.72      | 16.14             | 16.14                |
| 3&4&5                                     | 24.38      | 24.76      | 21.33             | 21.3                 |
| 3&4&6                                     | 20.76      | 20.87      | 24.33             | 24.35                |
| 3&5&6                                     | 5.96       | 5.86       | 5.92              | 5.92                 |
| 4&5&6                                     | 23.35      | 24.09      | 25.35             | 25.55                |
| <b># Four feature class Combination</b>   |            |            |                   |                      |
| Name of feature classes                   | F-score(%) | F-score(%) | F-score(%)        | F-score(%)           |
| 1&2&3&4                                   | 49.16      | 48.79      | 48.69             | 48.6                 |

|                                         |              |              |              |              |
|-----------------------------------------|--------------|--------------|--------------|--------------|
| 1&2&3&5                                 | 7.02         | 5.44         | 15.01        | 15.02        |
| 1&2&3&6                                 | 5.77         | 4.55         | 1.81         | 1.81         |
| 1&2&4&5                                 | 50.71        | 50.92        | 50.33        | 50.44        |
| 1&2&4&6                                 | 48.82        | 48.94        | 48.33        | 48.38        |
| 1&2&5&6                                 | 15.47        | 11.91        | 10.21        | 10.21        |
| 1&3&4&5                                 | 49.74        | 50.36        | 46.44        | 46.47        |
| 1&3&4&6                                 | 46.7         | 46.93        | 46.51        | 46.51        |
| 1&3&5&6                                 | 7.48         | 8.72         | 6.17         | 6.17         |
| 1&4&5&6                                 | 46.73        | 47.95        | 48.13        | 48.1         |
| 2&3&4&5                                 | 38.12        | 39.52        | 32.94        | 32.92        |
| 2&3&4&6                                 | 36.33        | 37.87        | 37.09        | 37.06        |
| 2&3&5&6                                 | 16.96        | 13.39        | 14.09        | 14.1         |
| 2&4&5&6                                 | 32.47        | 33.53        | 34           | 34.01        |
| 3&4&5&6                                 | 21.13        | 21.77        | 22.28        | 22.33        |
|                                         |              |              |              |              |
| <b># Five feature class Combination</b> |              |              |              |              |
| Name of feature classes                 | F-score(%)   | F-score(%)   | F-score(%)   | F-score(%)   |
| 1&2&3&4&5                               | <b>51.34</b> | <b>52.21</b> | 51.61        | 51.61        |
| 1&2&3&4&6                               | 50.19        | 50.57        | 50.14        | 50.14        |
| 1&2&3&5&6                               | 16.37        | 14.19        | 11.45        | 11.45        |
| 1&2&4&5&6                               | 49.9         | 51.03        | 51.15        | 51.05        |
| 1&3&4&5&6                               | 47.1         | 48.37        | 48.12        | 48.13        |
| 2&3&4&5&6                               | 34.22        | 36.18        | 33.64        | 33.64        |
|                                         |              |              |              |              |
| <b># Six feature class Combination</b>  |              |              |              |              |
| Name of feature classes                 | F-score(%)   | F-score(%)   | F-score(%)   | F-score(%)   |
| 1&2&3&4&5&6                             | <b>51.21</b> | 51.62        | <b>51.93</b> | <b>51.99</b> |

**Table D2. The combination experiment after choosing modified features in Edge detection (with fixed best Trigger features)**

|                                        |                 | 2'+best<br>Trigger | 7'+best<br>Trigger | 2'&7'+best Trigger         |
|----------------------------------------|-----------------|--------------------|--------------------|----------------------------|
| <b>Title:Edge_Features_Combination</b> | <b>Original</b> | <b>pathlength</b>  | <b>sentence</b>    | <b>pathlength-sentence</b> |
| <b>Trigger-c</b>                       | <b>200000</b>   | 250000             | 200000             | 250000                     |
| <b>Edge-c</b>                          | <b>28000</b>    | 20000              | 2000               | 2500                       |
| <b>beta</b>                            | <b>0.65</b>     | 0.7                | 0.7                | 0.7                        |
| <b># One feature class</b>             |                 |                    |                    |                            |
| Name of feature classes                | F-score(%)      | F-score(%)         | F-score(%)         | F-score(%)                 |
| 1                                      | 27.97           | 25.8               | 24.37              | 22.6                       |
| 2                                      | 0               | 0                  | 0                  | 0                          |
| 4                                      | 17.67           | 12.88              | 18.15              | 15.53                      |
| 5                                      | 18.45           | 9.12               | 9.46               | 11.96                      |
| 6                                      | 13.09           | 6.68               | 14.68              | 7.27                       |
| 7                                      | 7.83            | 14.25              | 8.7                | 12.03                      |
| 8                                      | 23.03           | 21.41              | 21.41              | 21.41                      |
|                                        |                 |                    |                    |                            |
| <b># Two feature class Combination</b> |                 |                    |                    |                            |
| Name of feature classes                | F-score(%)      | F-score(%)         | F-score(%)         | F-score(%)                 |
| 1&2                                    | 18.55           | 24.47              | 28.15              | 27.05                      |
| 1&4                                    | 24.17           | 22.2               | 21.65              | 13.25                      |
| 1&5                                    | 24.19           | 6.08               | 9.15               | 4.12                       |
| 1&6                                    | 22.09           | 5.15               | 15.51              | 5.3                        |
| 1&7                                    | 32.91           | 25.96              | 24.42              | 25.15                      |
| 1&8                                    | 23.46           | 21.88              | 22.51              | 21.96                      |
| 2&4                                    | 0               | 0                  | 0                  | 0                          |
| 2&5                                    | 0               | 0.33               | 4.83               | 1.18                       |
| 2&6                                    | 22.42           | 22.57              | 23.79              | 23.05                      |
| 2&7                                    | 0               | 0                  | 0                  | 0                          |
| 2&8                                    | 0               | 0                  | 0                  | 0                          |
| 4&5                                    | 27.15           | 31.35              | 29.15              | 31.46                      |
| 4&6                                    | 15.48           | 5.31               | 5.71               | 5.71                       |
| 4&7                                    | 14.68           | 17                 | 15.12              | 12.78                      |
| 4&8                                    | 26.43           | 27.4               | 28.11              | 27.43                      |
| 5&6                                    | 13              | 3.89               | 4.25               | 3.16                       |
| 5&7                                    | 18.2            | 22.45              | 21.94              | 12.5                       |

|                                          |            |            |            |            |
|------------------------------------------|------------|------------|------------|------------|
| 5&8                                      | 27.42      | 33.15      | 32.68      | 32.33      |
| 6&7                                      | 10.84      | 5.94       | 10.46      | 7.05       |
| 6&8                                      | 12.66      | 15.61      | 17.79      | 6.28       |
| 7&8                                      | 5.06       | 15.4       | 9.58       | 12.16      |
|                                          |            |            |            |            |
| <b># Three feature class Combination</b> |            |            |            |            |
| Name of feature classes                  | F-score(%) | F-score(%) | F-score(%) | F-score(%) |
| 1&2&4                                    | 23.03      | 31.36      | 34.65      | 34.66      |
| 1&2&5                                    | 31.98      | 37.74      | 38.9       | 38.73      |
| 1&2&6                                    | 44.2       | 45.75      | 45.6       | 45.37      |
| 1&2&7                                    | 2.85       | 15.5       | 15.58      | 16.71      |
| 1&2&8                                    | 25.69      | 32.77      | 36.67      | 35.26      |
| 1&4&5                                    | 25.51      | 11.3       | 9.99       | 5.31       |
| 1&4&6                                    | 19.4       | 6.84       | 7.15       | 7.36       |
| 1&4&7                                    | 29.88      | 25.62      | 25.42      | 25.86      |
| 1&4&8                                    | 24.43      | 22.96      | 23.18      | 21.86      |
| 1&5&6                                    | 8.26       | 3.85       | 4.25       | 3.91       |
| 1&5&7                                    | 22.66      | 18.49      | 5.59       | 5.19       |
| 1&5&8                                    | 23.28      | 18.67      | 18.85      | 9.72       |
| 1&6&7                                    | 24.5       | 16.6       | 14.58      | 15.7       |
| 1&6&8                                    | 15.66      | 16.67      | 17.39      | 9.04       |
| 1&7&8                                    | 18.74      | 24.17      | 14.94      | 19.99      |
| 2&4&5                                    | 25.92      | 15.59      | 26.12      | 25.82      |
| 2&4&6                                    | 30.53      | 29.01      | 29.3       | 30.31      |
| 2&4&7                                    | 0          | 0          | 0          | 0          |
| 2&4&8                                    | 0          | 0          | 0          | 0          |
| 2&5&6                                    | 42.01      | 42.77      | 43.17      | 42.16      |
| 2&5&7                                    | 3.4        | 5.35       | 4.43       | 4.66       |
| 2&5&8                                    | 0          | 0.45       | 0          | 1.76       |
| 2&6&7                                    | 18.51      | 20.08      | 18.17      | 19.39      |
| 2&6&8                                    | 18         | 19.06      | 19.68      | 19.15      |
| 2&7&8                                    | 0          | 0          | 0          | 0          |
| 4&5&6                                    | 8.84       | 5.72       | 8.83       | 9.16       |
| 4&5&7                                    | 29.14      | 29.26      | 30.15      | 28.54      |
| 4&5&8                                    | 30.45      | 36.46      | 35         | 34.09      |
| 4&6&7                                    | 19.45      | 8.67       | 15.33      | 9.12       |
| 4&6&8                                    | 17.25      | 5.37       | 5.48       | 6.31       |
| 4&7&8                                    | 26.31      | 29.12      | 23.63      | 25.84      |
| 5&6&7                                    | 14.26      | 6.13       | 5.15       | 4.27       |
| 5&6&8                                    | 7.69       | 9.3        | 9.87       | 13.98      |
| 5&7&8                                    | 28.11      | 30.27      | 31.15      | 29.73      |
| 6&7&8                                    | 17.95      | 4.63       | 4.35       | 3.36       |
|                                          |            |            |            |            |
| <b># Four feature class Combination</b>  |            |            |            |            |
| Name of feature classes                  | F-score(%) | F-score(%) | F-score(%) | F-score(%) |
| 1&2&4&5                                  | 38.84      | 42.7       | 43.35      | 43.38      |
| 1&2&4&6                                  | 44.51      | 45.18      | 44.67      | 44.61      |
| 1&2&4&7                                  | 13.84      | 25.83      | 25.64      | 27.23      |
| 1&2&4&8                                  | 31.17      | 37.66      | 38.36      | 38.71      |
| 1&2&5&6                                  | 46.1       | 49.16      | 48.47      | 48.45      |
| 1&2&5&7                                  | 28.96      | 35.87      | 35.38      | 35.22      |
| 1&2&5&8                                  | 37.21      | 38.03      | 39.23      | 39.25      |
| 1&2&6&7                                  | 41.74      | 44.41      | 44.24      | 43.89      |
| 1&2&6&8                                  | 44.08      | 49.82      | 50.03      | 49.56      |
| 1&2&7&8                                  | 8.6        | 25.98      | 25.31      | 25.4       |
| 1&4&5&6                                  | 20.05      | 5.96       | 6.06       | 5.13       |
| 1&4&5&7                                  | 28.76      | 21.42      | 11.91      | 8.91       |
| 1&4&5&8                                  | 24.42      | 27.99      | 27.97      | 23.06      |
| 1&4&6&7                                  | 23.34      | 12.61      | 17.06      | 10.01      |
| 1&4&6&8                                  | 19.01      | 9.07       | 17.41      | 8.56       |
| 1&4&7&8                                  | 24.22      | 24.29      | 10.5       | 19.99      |
| 1&5&6&7                                  | 20.78      | 6.61       | 5.47       | 5.7        |
| 1&5&6&8                                  | 7.89       | 5.27       | 8.99       | 4.9        |
| 1&5&7&8                                  | 18.84      | 18.27      | 7.59       | 16.14      |
| 1&6&7&8                                  | 1.8        | 15.81      | 8.34       | 6.12       |
| 2&4&5&6                                  | 46.13      | 47.23      | 47.88      | 47.14      |
| 2&4&5&7                                  | 8.18       | 8.27       | 8.32       | 9.6        |

|                                         |              |              |              |              |
|-----------------------------------------|--------------|--------------|--------------|--------------|
| 2&4&5&8                                 | 23.92        | 24.19        | 26.31        | 25.38        |
| 2&4&6&7                                 | 23.8         | 24.64        | 23.57        | 23.98        |
| 2&4&6&8                                 | 39.53        | 34.2         | 40.05        | 39.71        |
| 2&4&7&8                                 | 0            | 0            | 0            | 0            |
| 2&5&6&7                                 | 35.26        | 37.03        | 34.64        | 34.45        |
| 2&5&6&8                                 | 47.42        | 48.21        | 47.94        | 47.61        |
| 2&5&7&8                                 | 0            | 0            | 0            | 0.45         |
| 2&6&7&8                                 | 10.19        | 17.57        | 13.64        | 15.07        |
| 4&5&6&7                                 | 2.33         | 5.83         | 6.35         | 5.92         |
| 4&5&6&8                                 | 17.78        | 14.75        | 23.43        | 20.69        |
| 4&5&7&8                                 | 32.1         | 33.8         | 36.41        | 33.83        |
| 4&6&7&8                                 | 6.24         | 5.75         | 5.85         | 9.27         |
| 5&6&7&8                                 | 10.84        | 7.55         | 8.46         | 3.38         |
|                                         |              |              |              |              |
| <b># Five feature class Combination</b> |              |              |              |              |
| Name of feature classes                 | F-score(%)   | F-score(%)   | F-score(%)   | F-score(%)   |
| 1&2&4&5&6                               | 49.02        | 50.91        | 50.15        | 50.54        |
| 1&2&4&5&7                               | 35.65        | 39.64        | 40.55        | 40.94        |
| 1&2&4&5&8                               | 39.6         | 41.5         | 42.25        | 41.93        |
| 1&2&4&6&7                               | 43.96        | 43.72        | 43.61        | 43.54        |
| 1&2&4&6&8                               | 50.23        | 51.04        | 50.59        | 50.86        |
| 1&2&4&7&8                               | 23.85        | 33.98        | 33.94        | 34.73        |
| 1&2&5&6&7                               | 44.19        | 46.45        | 46.38        | 46.28        |
| 1&2&5&6&8                               | 51.18        | 51.13        | 50.65        | 51.09        |
| 1&2&5&7&8                               | 34.37        | 37.14        | 36.84        | 37.22        |
| 1&2&6&7&8                               | 41.78        | 50.34        | 49.04        | 48.28        |
| 1&4&5&6&7                               | 22.81        | 5.75         | 5.44         | 5.81         |
| 1&4&5&6&8                               | 18.97        | 14.17        | 13.55        | 12.87        |
| 1&4&5&7&8                               | 25.81        | 23.61        | 12.93        | 15.72        |
| 1&4&6&7&8                               | 14.4         | 15.21        | 7.15         | 8.26         |
| 1&5&6&7&8                               | 5.4          | 5.75         | 4.47         | 4.16         |
| 2&4&5&6&7                               | 42.79        | 44.18        | 42.27        | 43.25        |
| 2&4&5&6&8                               | 49.26        | 50.42        | 50.48        | 50.2         |
| 2&4&5&7&8                               | 3.7          | 4.34         | 4.25         | 6.12         |
| 2&4&6&7&8                               | 26.31        | 28.52        | 26.57        | 28.08        |
| 2&5&6&7&8                               | 44.17        | 45.5         | 43.32        | 43.39        |
| 4&5&6&7&8                               | 11.28        | 16.14        | 6.74         | 9.12         |
|                                         |              |              |              |              |
| <b># Six feature class Combination</b>  |              |              |              |              |
| Name of feature classes                 | F-score(%)   | F-score(%)   | F-score(%)   | F-score(%)   |
| 1&2&4&5&6&7                             | 47.29        | 49.64        | 49.36        | 49.13        |
| 1&2&4&5&6&8                             | 51.81        | 52.29        | 51.44        | 51.85        |
| 1&2&4&5&7&8                             | 36.85        | 38.86        | 39.04        | 39.18        |
| 1&2&4&6&7&8                             | 50.33        | 51.79        | 51.7         | 51.81        |
| 1&2&5&6&7&8                             | 51.29        | 51.61        | 51.45        | 51.65        |
| 1&4&5&6&7&8                             | 14.22        | 15.09        | 4.13         | 5.11         |
| 2&4&5&6&7&8                             | 48.32        | 48.82        | 48.17        | 48.1         |
|                                         |              |              |              |              |
| <b># Seven class Combination</b>        |              |              |              |              |
| Name of feature classes                 | F-score(%)   | F-score(%)   | F-score(%)   | F-score(%)   |
| 1&2&4&5&6&7&8                           | <b>52.16</b> | <b>52.37</b> | <b>52.47</b> | <b>52.68</b> |

## Appendix E

### (Feature combination experiment with modified features)

**Table E2. Contribution of sole Trigger feature**

| #Sentence feature | f-score (%) | Feature size | Contribution of sole feature |    |
|-------------------|-------------|--------------|------------------------------|----|
| bow               | N/A         | 15962        |                              |    |
| nameCount         | N/A         | 15           |                              |    |
| ne_token          | N/A         | 3021         |                              |    |
| #main features    |             |              |                              |    |
| POS               | 1.52        | 47           | 0.03234                      | ★★ |
| txt               | 35.5        | 13727        | 0.00259                      | ★  |
| nonstem           | 6.43        | 154          | 0.04175                      | ★★ |
| stem              | 35.45       | 11016        | 0.00322                      | ★  |
| #linear order     |             |              |                              |    |
| linear            | 3.5         | 73744        | 4.7E-05                      |    |
| #content          |             |              |                              |    |
| upper             | 0           | 2            | 0                            |    |
| has               | 0           | 4            | 0                            |    |
| dt                | 20.13       | 1172         | 0.01718                      | ★★ |
| tt                | 27.63       | 7395         | 0.00374                      | ★  |
| #attached edge    |             |              |                              |    |
| t1HIn             | 2.4         | 47410        | 5.1E-05                      |    |
| t1HOut            | 7.69        | 53151        | 0.00014                      |    |
| chain             |             |              |                              |    |
| chain             | 5.47        | 136239       | 4E-05                        |    |
| dep               | 3.57        | 1148         | 0.00311                      | ★  |
| dist              | 8.26        | 40958        | 0.0002                       |    |
| total             | 51.21       | 405165       | 0.00013                      |    |

**Table E2. Contribution of sole Edge feature**

|                                                                                             | Feature size | f-score (%) | Feature size | Contribution of sole feature |    |
|---------------------------------------------------------------------------------------------|--------------|-------------|--------------|------------------------------|----|
| #EntityFeatures                                                                             | 4319         |             | 4319         |                              |    |
| e1_txt                                                                                      | 1218         |             |              |                              |    |
| e2_txt                                                                                      | 2828         | 11.08       | 4046         | 0.002738507                  |    |
| e1_POS                                                                                      | 22           |             |              |                              |    |
| e2_POS                                                                                      | 25           | 8.32        | 47           | 0.177021277                  |    |
| e1_annType                                                                                  | 25           |             |              |                              |    |
| e2_annType                                                                                  | 26           | 46.44       | 51           | 0.910588235                  | ★  |
| e1_strength                                                                                 | 31           |             |              |                              |    |
| e2_strength                                                                                 | 31           | 0           | 62           | 0                            |    |
| e1_InteractionWord_e2_                                                                      | 2            | 27.31       | 2            | 13.655                       | ★★ |
| eTypes                                                                                      | 110          | 13.91       | 110          | 0.126454545                  |    |
| selfLoop                                                                                    | 1            | 0           | 1            | 0                            |    |
| #PathLengthFeatures                                                                         | 25           |             |              |                              |    |
| len                                                                                         | 1            | 0           | 1            | 0                            |    |
| len_tokens                                                                                  | 24           | 32.16       | 24           | 1.34                         | ★  |
| #TerminusTokenFeatures( thisfeature class is totally repeated with ones in #EntityFeatures) | 4144         |             | 4144         | 0                            |    |
| tokTerm1_txt                                                                                | 1218         |             |              |                              |    |
| tokTerm2_txt                                                                                | 2828         | 11.08       | 4046         | 0.002738507                  |    |
| tokTerm1_POS                                                                                | 22           |             |              |                              |    |
| tokTerm2_POS                                                                                | 25           | 8.32        | 47           | 0.177021277                  |    |
| tokTerm1_annType                                                                            | 25           |             |              |                              |    |
| tokTerm2_annType                                                                            | 26           | 1.31        | 51           | 0.025686275                  |    |
| #SingleElementFeatures                                                                      | 2593         |             | 2593         | 0                            |    |

|                    |                  |       |        |             |
|--------------------|------------------|-------|--------|-------------|
| dep_Forward        | 105              |       |        |             |
| dep_Reverse        | 123              | 6.85  | 228    | 0.03004386  |
| internalPOS        | 29               | 0     | 29     | 0           |
| internalTxt        | 2225             | 13.69 | 2225   | 0.006152809 |
| internalDep        | 111              | 1.31  | 111    | 0.011801802 |
|                    |                  |       |        |             |
| #PathGrams         | 441684           |       | 441684 | 0           |
| tokenPath          | 8009             | N/A   | 8009   | #VALUE!     |
| tok_               | 22543            | 6.81  | 22543  | 0.000302089 |
| depGram_           | 26897            | 18.41 | 26897  | 0.000684463 |
| dep_[RF]{2,4}[0-3] | 3886             | 15.19 | 3886   | 0.003908904 |
| edge_directions    | 746              | 30.17 | 746    | 0.040442359 |
| Special            | 376797 +<br>2806 | 21.46 | 379603 | 5.65327E-05 |
|                    |                  |       |        |             |
| #PathEdgeFeature   | 25038            |       | 25038  | 0           |
| txt                | 2535             | 13.55 | 2535   | 0.005345168 |
| POS                | 32               | 18.18 | 32     | 0.568125 ★  |
| annType            | 33               | 1.67  | 33     | 0.050606061 |
| gov                | 15176            | 5.13  | 15176  | 0.000338034 |
| triple             | 7135             | 15.4  | 7135   | 0.002158374 |
| dep_               | 127              | 18.78 | 127    | 0.147874016 |
|                    |                  |       |        |             |
| #SentenceFeatures  | 33               |       | 33     |             |
| count              | 33               | 7.83  | 33     | 0.237272727 |
|                    |                  |       |        |             |
| #GENIA             | 4                | 23.03 | 4      | 5.7575 ★★   |
| total              | 477840           |       |        |             |
